# Supplementary material
Source: PubMed Central journal article supplement (PMC6761829)
Supplement: NIHMS1530257-supplement-3.pdf [file NIHMS1530257-supplement-3.pdf]

**Supplementary Table 1: Human HSP Missense Mutations**

| <b>Human HSP mutation</b> | <b>Human numbering</b> | <b>Drosophila numbering</b> | <b>Likely cause for impairment</b> |
|---------------------------|------------------------|-----------------------------|------------------------------------|
| p.I344K                   | 344                    | 485                         | nucleotide binding                 |
| p.G346C                   | 346                    | 487                         | nucleotide binding                 |
| p.Q347K                   | 347                    | 488                         | nucleotide binding                 |
| p.Q347P                   | 347                    | 488                         | nucleotide binding                 |
| p.E356G                   | 356                    | 497                         | oligomerization                    |
| p.L360P                   | 360                    | 501                         | oligomerization                    |
| p.P361L                   | 361                    | 502                         | oligomerization                    |
| p.P361S                   | 361                    | 502                         | oligomerization                    |
| p.S362C                   | 362                    | 503                         | uncategorized                      |
| p.R364M                   | 364                    | 505                         | oligomerization                    |
| p.L367S                   | 367                    | 508                         | oligomerization                    |
| p.F368L                   | 368                    | 509                         | oligomerization                    |
| p.F368S                   | 368                    | 509                         | oligomerization                    |
| p.T369P                   | 369                    | 510                         | oligomerization                    |
| p.G370R                   | 370                    | 511                         | oligomerization                    |
| p.R372G                   | 372                    | 513                         | oligomerization                    |
| p.P374R                   | 374                    | 515                         | oligomerization                    |
| p.G377E                   | 377                    | 518                         | folding/stability                  |
| p.L378G                   | 378                    | 519                         | folding/stability                  |
| p.F381C                   | 381                    | 522                         | folding/stability                  |
| p.F381L                   | 381                    | 522                         | folding/stability                  |
| p.G385W                   | 385                    | 526                         | nucleotide binding                 |
| p.G385E                   | 385                    | 526                         | nucleotide binding                 |
| p.N386K                   | 386                    | 527                         | nucleotide binding                 |
| p.K388R                   | 388                    | 529                         | nucleotide binding                 |
| p.M390V                   | 390                    | 531                         | nucleotide binding                 |
| p.S399L                   | 399                    | 540                         | folding/stability                  |
| p.I406V                   | 406                    | 547                         | folding/stability                  |
| p.S407R                   | 407                    | 548                         | oligomerization                    |
| p.G417E                   | 417                    | 558                         | oligomerization                    |
| p.V423L                   | 423                    | 564                         | folding/stability                  |
| p.R424G                   | 424                    | 565                         | oligomerization                    |
| p.L426V                   | 426                    | 567                         | folding/stability                  |
| p.F427C                   | 427                    | 568                         | folding/stability                  |
| p.A428P                   | 428                    | 569                         | folding/stability                  |
| p.P435T                   | 435                    | 576                         | folding/stability                  |
| p.P435L                   | 435                    | 576                         | folding/stability                  |
| p.S436F                   | 436                    | 577                         | folding/stability                  |
| p.D441G                   | 441                    | 582                         | Mg coordination                    |
| p.E442K                   | 442                    | 583                         | ATP binding                        |
| p.D444E                   | 444                    | 585                         | oligomerization                    |

|                      |     |     |                                                |
|----------------------|-----|-----|------------------------------------------------|
| p.D444N              | 444 | 585 | oligomerization                                |
| p.D444G              | 444 | 585 | oligomerization                                |
| p.L447V              | 447 | 588 | folding/stability                              |
| p.C448Y              | 448 | 589 | oligomerization                                |
| p.R450S              | 450 | 591 | oligomerization                                |
| p.S458R              | 458 | 599 | folding/stability                              |
| p.R459G              | 459 | 600 | oligomerization                                |
| p.R459T              | 459 | 600 | oligomerization                                |
| p.R460C              | 460 | 601 | oligomerization                                |
| p.R460L              | 460 | 601 | oligomerization                                |
| p.L461P              | 461 | 602 | folding/stability                              |
| p.L466V              | 466 | 607 | folding/stability                              |
| p.G471D              | 471 | 612 | folding/stability                              |
| p.N487D              | 487 | 629 | $\gamma$ -phosphate sensing, oligomerization   |
| p.P489L              | 489 | 631 | folding/stability                              |
| p.D493G              | 493 | 635 | oligomerization                                |
| p.R498S              | 498 | 640 | phosphate binding                              |
| p.R499C (Arg finger) | 499 | 641 | ATP hydrolysis and $\gamma$ -phosphate sensing |
| p.R499H (Arg finger) | 499 | 641 | ATP hydrolysis and $\gamma$ -phosphate sensing |
| p.R503W              | 503 | 645 | folding/stability/oligomerization              |
| p.R503L              | 503 | 645 | folding/oligomerization                        |
| p.R503G              | 503 | 645 | folding/oligomerization                        |
| p.R514G              | 514 | 656 | folding/stability                              |
| p.G527N              | 527 | 669 | folding/stability                              |
| p.L537P              | 537 | 679 | folding/stability                              |
| p.G546R              | 546 | 688 | folding/stability                              |
| p.L549P              | 549 | 691 | folding/stability                              |
| p.A551Y              | 551 | 693 | oligomerization                                |
| p.A551P              | 551 | 693 | oligomerization                                |
| p.D555N              | 555 | 697 | oligomerization                                |
| p.D555G              | 555 | 697 | oligomerization                                |
| p.A556V              | 556 | 698 | folding/stability                              |
| p.A557V              | 557 | 699 | folding/stability                              |
| p.G559D              | 559 | 701 | oligomerization                                |
| p.R561G              | 561 | 703 | oligomerization                                |
| p.R562Q              | 562 | 704 | oligomerization                                |
| p.N579H              | 579 | 721 | unclear                                        |
| p.D584H              | 584 | 725 | unclear                                        |
| p.D584V              | 584 | 725 | unclear                                        |
| p.W607C              | 607 | 749 | folding/stability                              |
| p.D613G              | 613 | 755 | oligomerization                                |
| p.D613H              | 613 | 755 | oligomerization                                |
| p.T615I              | 615 | 757 | oligomerization                                |
